# Supplementary material for: The impact of local government debt governance on carbon emissions: evidence from Chinese cities
Source: Frontiers journal article supplement (doi:10.3389/fenvs.2025.1613947), 2025-07-10
Supplement: Supplementary_file_1.docx [file Supplementary_file_1.docx]

**Appendix**

This paper eliminates samples with missing economic fundamentals and key variables, resulting in 274 cities, as follows:

| Region | Province | City | Sample |
| --- | --- | --- | --- |
| Eastern | Hebei Province | Shijiazhuang City, Tangshan City, Qinhuangdao City, Handan City, Xingtai City, Baoding City, Zhangjiakou City, Chengde City, Cangzhou City, Langfang City, Hengshui City | 11 |
| Liaoning Province | Shenyang City, Dalian City, Anshan City, Fushun City, Benxi City, Dandong City, Jinzhou City, Yingkou City, Fuxin City, Panjin City, Tieling City, Chaoyang City, Huludao City | 13 |
| Jiangsu Province | Nanjing City, Wuxi City, Xuzhou City, Changzhou City, Suzhou City, Nantong City, Lianyungang City, Huai'an City, Yancheng City, Yangzhou City, Zhenjiang City, Taizhou City, Suqian City | 13 |
| Zhejiang Province | Hangzhou City, Ningbo City, Wenzhou City, Jiaxing City, Huzhou City, Shaoxing City, Jinhua City, Zhoushan City, Taizhou City | 9 |
| Fujian Province | Fuzhou City, Xiamen City, Putian City, Sanming City, Quanzhou City, Zhangzhou City, Nanping City, Longyan City | 8 |
| Shandong Province | Jinan City, Qingdao City, Zibo City, Zaozhuang City, Dongying City, Yantai City, Weifang City, Jining City, Tai'an City, Weihai City, Rizhao City, Linyi City, Dezhou City, Liaocheng City, Binzhou City, Heze City | 16 |
| Hainan Province | Haikou City | 1 |
| Heilongjiang Province | Harbin City, Qiqihar City, Jixi City, Hegang City, Shuangyashan City, Daqing City, Yichun City, Jiamusi City, Qitaihe City, Mudanjiang City, Heihe City | 11 |
| Jilin Province | Changchun City, Jilin City, Siping City, Liaoyuan City, Tonghua City, Songyuan City, Baicheng City | 7 |
| Guangdong Province | **Guangzhou City, Shaoguan City, Shenzhen City, Zhuhai City, Shantou City, Foshan City, Jiangmen City, Zhanjiang City, Maoming City, Zhaoqing City, Huizhou City, Meizhou City, Shanwei City, Heyuan City, Yangjiang City, Qingyuan City, Dongguan City, Zhongshan City, Chaozhou City, Jieyang City, Yunfu City** | 21 |
| central | Hubei Province | Wuhan City, Huangshi City, Shiyan City, Yichang City, Xiangyang City, Jingmen City, Xiaogan City, Jingzhou City, Huanggang City, Xianning City, Suizhou City | 11 |
| Shanxi Province | Taiyuan City, Datong City, Changzhi City, Jincheng City, Shuozhou City, Jinzhong City, Yuncheng City, Xinzhou City, Linfen City, and Luliang City | **10** |
| Henan Province | Zhengzhou City, Kaifeng City, Luoyang City, Pingdingshan City, Anyang City, Hebi City, Xinxiang City, Jiaozuo City, Puyang City, Xuchang City, Luohe City, Sanmenxia City, Nanyang City, Shangqiu City, Xinyang City, Zhoukou City, Zhumadian City | **17** |
| Anhui Province | Hefei City, Wuhu City, Bengbu City, Huainan City, Maanshan City, Huai'an City, Tongling City, Anqing City, Huangshan City, Fuyang City, Suzhou City, Chuzhou City, Lu'an City, Xuancheng City, Chizhou City, Bozhou City | **16** |
| Jiangxi Province | Nanchang City, Jingdezhen City, Pingxiang City, Jiujiang City, Fuzhou City, Yingtan City, Ganzhou City, Ji'an City, Yichun City, Xinyu City, Shangrao City | 11 |
| Hunan Province | Changsha City, Zhuzhou City, Xiangtan City, Hengyang City, Shaoyang City, Yueyang City, Changde City, Zhangjiajie City, Yiyang City, Chenzhou City, Yongzhou City, Huaihua City, Loudi City | 13 |
| western | Sichuan Province | Chengdu City, Zigong City, Panzhihua City, Luzhou City, Deyang City, Mianyang City, Guangyuan City, Suining City, Neijiang City, Leshan City, Nanchong City, Meishan City, Yibin City, Guang'an City, Dazhou City, Ya'an City, Bazhong City, Ziyang City | 18 |
| Guizhou Province | Guiyang City, Liupanshui City, Zunyi City, Anshun City, Bijie City, Tongren City | 6 |
| Yunnan Province | Kunming City, Qujing City, Yuxi City, Baoshan City, Zhaotong City, Lijiang City, Pu'er City, Lincang City | 8 |
| Shaanxi Province | Xi'an City, Tongchuan City, Baoji City, Xianyang City, Weinan City, Yan'an City, Hanzhong City, Yulin City, Ankang City, Shangluo City | 10 |
| Gansu Province | Lanzhou City, Jiayuguan City, Jinchang City, Baiyin City, Tianshui City, Wuwei City, Zhangye City, Pingliang City, Jiuquan City, Qingyang City, Dingxi City | 11 |
| Qinghai Province | Xining City | 1 |
| Ningxia Hui Autonomous Region | Yinchuan City, Shizuishan City, Wuzhong City, Guyuan City, Zhongwei City | 5 |
| Xinjiang Uyghur Autonomous Region | Urumqi City, Karamay City, Turpan City, Hami City | 4 |
| Inner Mongolia Autonomous Region | Hohhot City, Baotou City, Wuhai City, Chifeng City, Tongliao City, Ordos City, Hulunbuir City, Bayannur City, Ulanqab City | 9 |
| Guangxi Zhuang Autonomous Region | Nanning City, Liuzhou City, Guilin City, Wuzhou City, Beihai City, Fangchenggang City, Qinzhou City, Guigang City, Yulin City, Baise City, Hezhou City, Hechi City, Laibin City, Chongzuo City | 14 |

The cities excluded are: The cities of Lhasa, Shigatse, Changdu, Linzhi, Shannan, and Nagqu in the Tibet Autonomous Region. Yangquan City, Sanya City, Liaoyang City, Baishan City, Quzhou City, Lishui City, Ningde City, Xinyang City, Danzhou City, Ezhou City, Longnan City, Haidong City. Suihua City
